# Supplementary material for: Exogenous expression of ATP8, a mitochondrial encoded protein, from the nucleus in vivo
Source: PubMed Central journal article supplement — Mol Ther Methods Clin Dev. 2024 Nov 6;32(4):101372. doi: 10.1016/j.omtm.2024.101372 (PMC11629202; doi:10.1016/j.omtm.2024.101372), 2024-11-06
Supplement: mmc1.pdf [file mmc1.pdf]

OMTM, Volume 32

## Supplemental information

### **Exogenous expression of ATP8, a mitochondrial encoded protein, from the nucleus *in vivo***

**David V. Begelman, Bhavna Dixit, Carly Truong, Christina D. King, Mark A. Watson, Birgit Schilling, Martin D. Brand, and Amutha Boominathan**

**Figure S1**

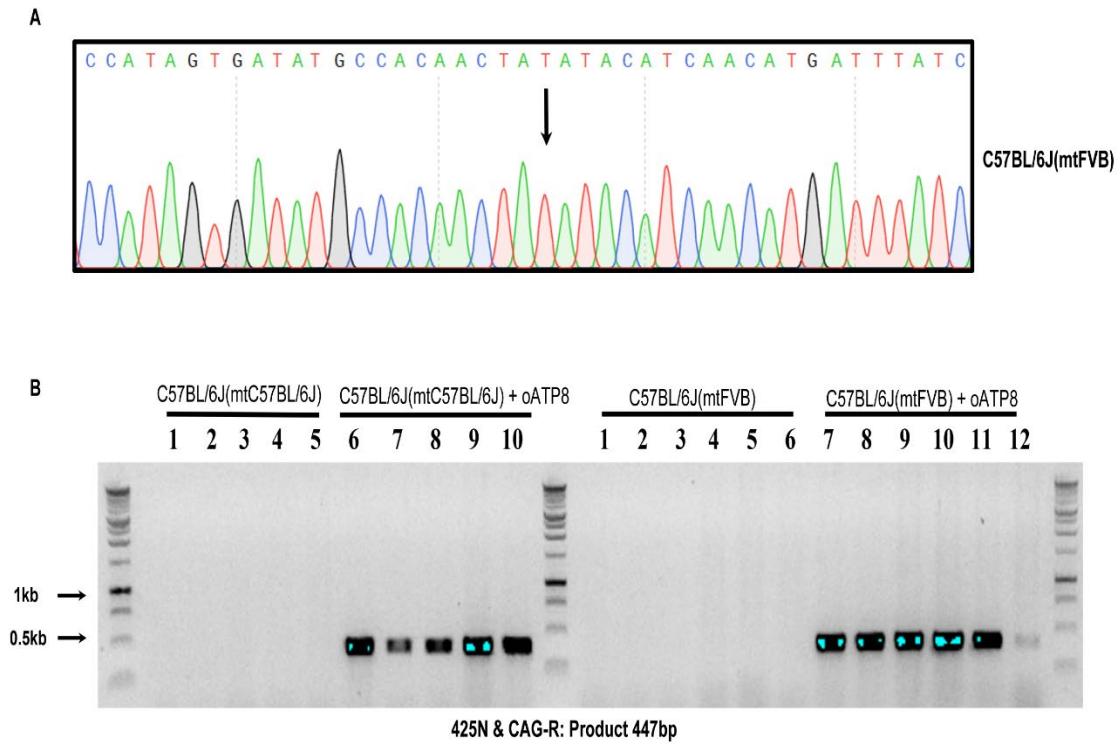

Figure S1: Chromatogram showcasing Sanger sequencing verification of the m.7778G-T polymorphism present in the mitochondrial genome of C57BL/6J(mtFVB) animals (S1A). Additional PCR results confirming the presence of the oATP8 construct in the nuclear genome (S1B).

**Figure S2**

**A**

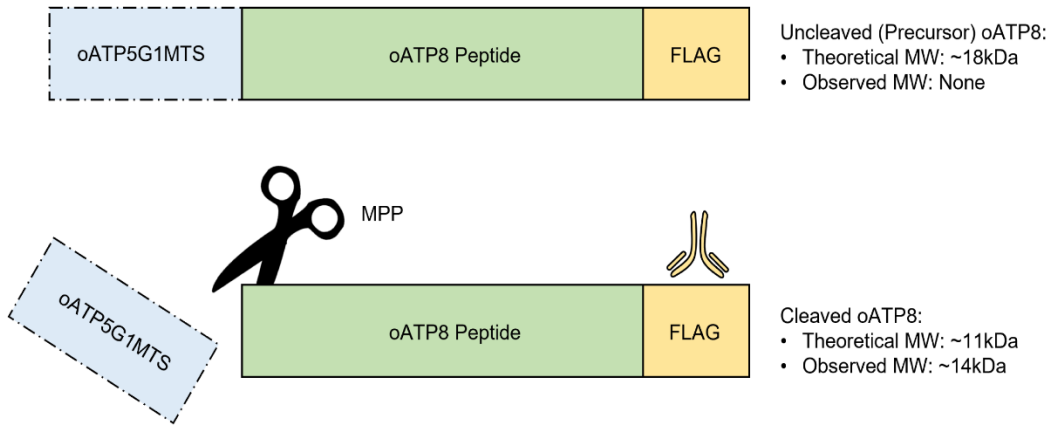

**B**

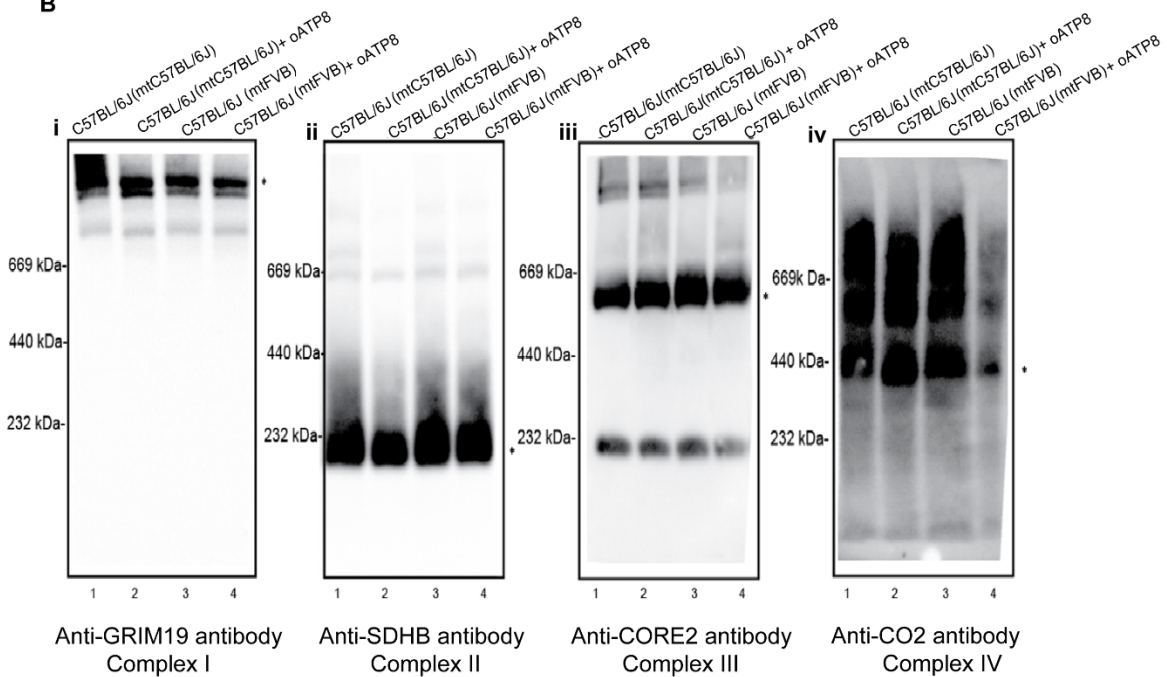

Figure S2: Schematic representation of the theoretical and observed molecular weights of the oATP8 protein when the ATP5G1 MTS is not fully processed (top) and when the MTS is cleaved (bottom) upon translocation into the mitochondria (S2A). Blue-Native PAGE western blots using 25  $\mu$ g protein from mouse liver mitochondrial fractions of 12-week old non-transgenic and transgenic C57BL/6J(mtC57BL/6J) and C57BL/6J(mtFVB) strains (S2B) (n = 3).

Figure S3

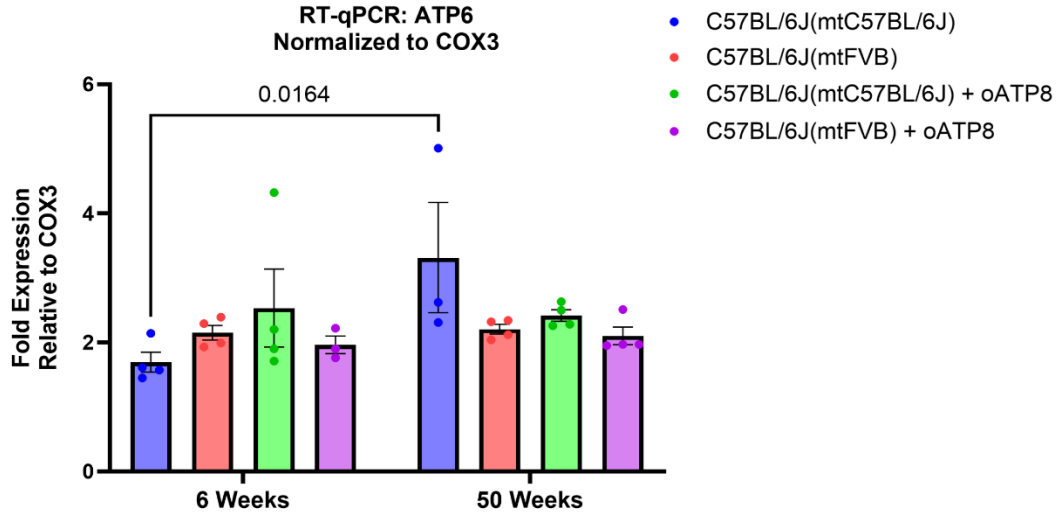

Figure S3: Quantitative RT-PCR detection of mRNA levels for endogenous ATP6 from brain from 50-week old mice. Endogenous ATP6 mRNA was normalized to COX3, a mitochondria-encoded gene (S3) (n = 3-4 animals, performed in triplicate). Error bars show SEM. Two-way ANOVA was performed; P = 0.0165.

Figure S4

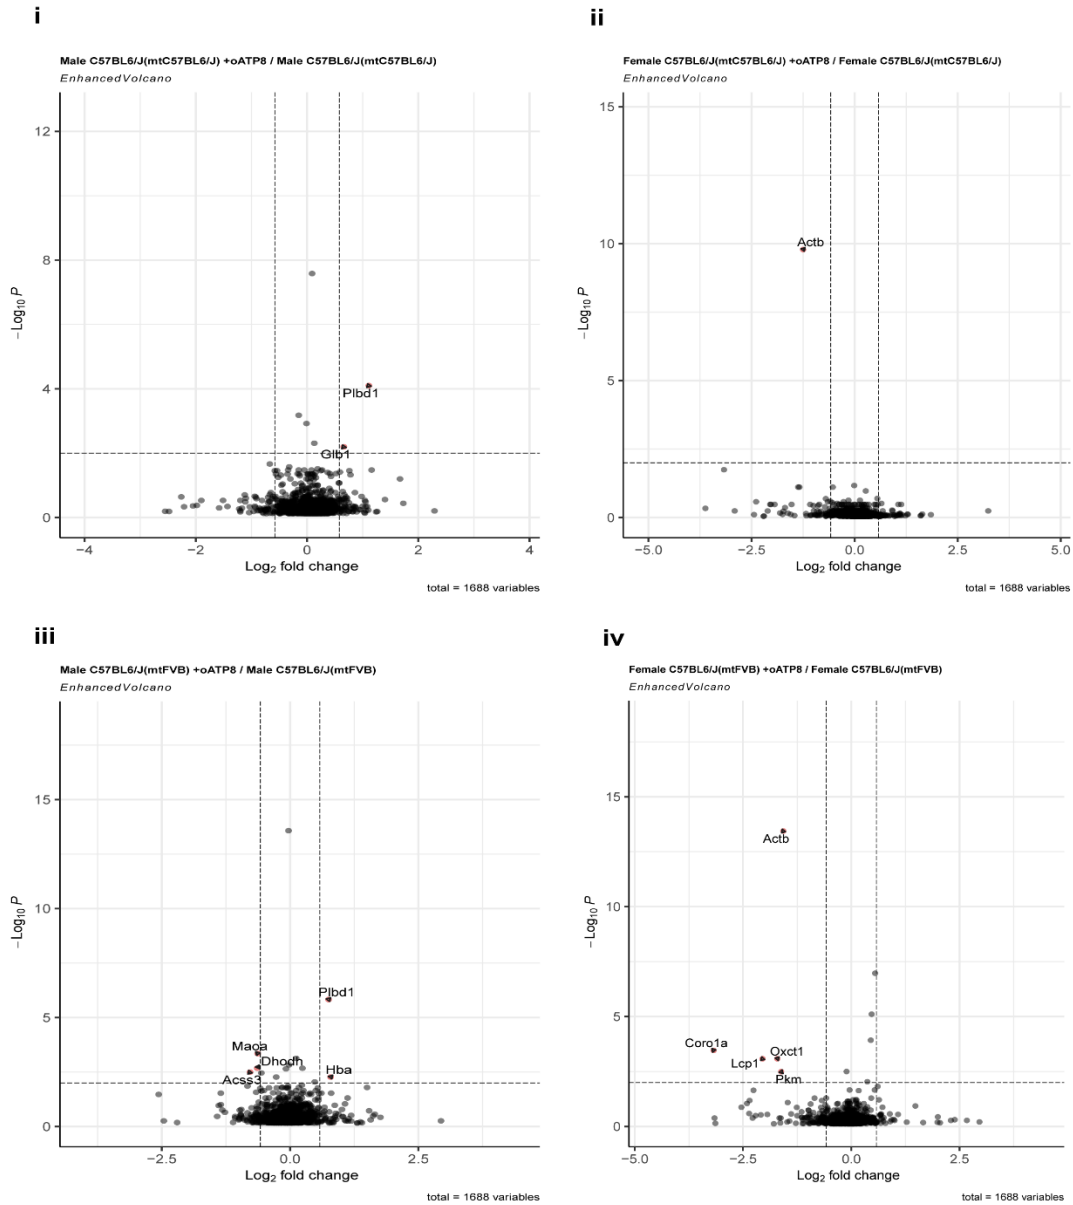

Figure S4: Volcano plot representing global proteomic profiles of 12-week old mice with the following comparisons: (S4i) Male Control Transgenic / Male Control Non-Transgenic; (S4ii) Female Control Transgenic / Female Control Non-Transgenic; (S4iii) Male Mutant Transgenic / Male Mutant Non-Transgenic; (S4iv) Female Mutant Transgenic / Female Mutant Non-Transgenic (n = 3 animals). A total of 1688 proteins were detected. Significantly altered proteins were determined using an absolute average  $\log_2$ ratio > 0.58 and Q value < 0.01. Labels represent genes.

**Table S1: ATP Hydrolysis Activity**

| Strain                       | Vmax  | 95% CI <sup>a</sup> | Km    | 95% CI <sup>a</sup> |
|------------------------------|-------|---------------------|-------|---------------------|
| C57BL/6J(mtC57BL/6J)         | 189.5 | 168.3 – 213.9       | 2.799 | 1.583 – 4.563       |
| C57BL/6J(mtFVB)              | 201.8 | 184.4 – 221.1       | 3.426 | 2.369 – 4.799       |
| C57BL/6J(mtC57BL/6J) + oATP8 | 205   | 192.7 – 218.2       | 2.857 | 2.123 – 3.762       |
| C57BL/6J(mtFVB) + oATP8      | 216.6 | 196.6 – 239.0       | 3.319 | 2.197 – 4.817       |

<sup>a</sup> 95% confidence interval

**Table S2: Oligomycin Sensitivity**

| Strain                       | IC50   | 95% CI <sup>a</sup> |
|------------------------------|--------|---------------------|
| C57BL/6J(mtC57BL/6J)         | 0.4881 | 0.4208 – 0.5472     |
| C57BL/6J(mtFVB)              | 0.4641 | 0.3922 – 0.5325     |
| C57BL/6J(mtC57BL/6J) + oATP8 | 0.5125 | 0.4833 – 0.5421     |
| C57BL/6J(mtFVB) + oATP8      | 0.4287 | 0.3767 – 0.4718     |

<sup>a</sup> 95% confidence interval

**Table S3: Open Field Test**

| Metric                        | C57BL/6J(mtC57BL/6J) | C57BL/6J(mtC57BL/6J) + oATP8 | C57BL/6J(mtFVB) | C57BL/6J(mtFVB) + oATP8 |
|-------------------------------|----------------------|------------------------------|-----------------|-------------------------|
| Total Moves                   | 386 + 14.4           | 383 + 21.8                   | 387 + 20.5      | 397 + 26.6              |
| Total Distance (cm)           | 865 + 204            | 862 + 170                    | 874 + 191       | 864 + 156               |
| Total Distance in Margin (cm) | 293 + 87.5           | 312 + 80.6                   | 324 + 108       | 320 + 74.5              |
| Total Distance in Center (cm) | 209 + 88.0           | 182 + 70.8                   | 181 + 58.9      | 190 + 68.1              |

Parameters assessed using open field. C57BL/6J(mtC57BL/6J) (n=20), C57BL/6J(mtC57BL/6J) + oATP8 (n=16), C57BL/6J(mtFVB), (n=20), C57BL/6J(mtFVB)+ oATP8 (n=18). Mean + SD is described.

**Table S4: Elevated Plus Maze Test**

| Metric                              | C57BL/6J(mtC57BL/6J) | C57BL/6J(mtC57BL/6J) + oATP8 | C57BL/6J(mtFVB) | C57BL/6J(mtFVB) + oATP8 |
|-------------------------------------|----------------------|------------------------------|-----------------|-------------------------|
| Total Distance (cm)                 | 2780 + 676           | 2970 + 682                   | 2620 + 599      | 2400 + 518              |
| Entries into Closed Arm             | 40.6 + 12.0          | 51.2 + 15.0                  | 40.9 + 11.4     | 37.0 + 11.6             |
| Time in Closed Arm (seconds)        | 514 + 45.4           | 497 + 49.2                   | 503 + 45.8      | 528 + 31.0              |
| Percent of Total Time in Closed Arm | 85.6 + 7.57          | 82.9 + 8.21                  | 83.9 + 7.64     | 87.9 + 5.16             |
| Entries into Open Arm               | 15.2 + 7.72          | 21.1 + 16.1                  | 14.4 + 8.54     | 11.9 + 6.04             |
| Time in Open Arm (seconds)          | 34.1 + 26.9          | 39.5 + 26.0                  | 33.3 + 24.5     | 27.2 + 15.8             |
| Percent of Total Time in Open Arm   | 5.68 + 4.49          | 6.58 + 4.33                  | 5.55 + 4.09     | 4.53 + 2.64             |

Parameters assessed using elevated plus maze. C57BL/6J(mtC57BL/6J) (n=16), C57BL/6J(mtC57BL/6J) + oATP8 (n=15), C57BL/6J(mtFVB), (n=17), C57BL/6J(mtFVB) + oATP8 (n=18). Mean + SD is described.

**Table S5: Metabolic Cage – Full Day Cycle**

| Metric              | C57BL/6J(mtC57BL/6J) | C57BL/6J(mtC57BL/6J) + oATP8 | C57BL/6J (mtFVB) | C57BL/6J(mtFVB)+ oATP8 |
|---------------------|----------------------|------------------------------|------------------|------------------------|
| Total Distance (cm) | 272 + 52.5           | 312 + 104                    | 237 + 55.8       | 287 + 239              |
| Non-Wheel Activity  | 206 + 45.9           | 250 + 85.4                   | 190 + 44.6       | 224 + 200              |
| Wheel Counts        | 7.97 + 4.34          | 7.20 + 6.34                  | 9.69 + 6.52      | 7.31 + 4.46            |
| Energy Balance      | 17.7 + 5.27          | 21.9 + 3.87                  | 19.9 + 3.35      | 17.3 + 8.82            |
| Energy Expenditure  | 0.381 + 0.0376       | 0.397 + 0.0285               | 0.362 + 0.0535   | 0.396 + 0.0198         |

|                            |                |                |                |                |
|----------------------------|----------------|----------------|----------------|----------------|
| Oxygen Consumption         | 77.0 + 7.59    | 80.5 + 5.71    | 73.2 + 10.8    | 80.4 + 4.10    |
| Carbon Dioxide Production  | 69.6 + 7.01    | 72.5 + 5.52    | 66.2 + 9.82    | 72.0 + 3.57    |
| Respiratory Exchange Ratio | 0.894 + 0.0132 | 0.893 + 0.0161 | 0.898 + 0.0183 | 0.888 + 0.0181 |
| Hourly Food Intake         | 18.1 + 5.24    | 22.3 + 3.88    | 20.3 + 3.35    | 17.7 + 8.81    |
| Hourly Water Intake        | 6.25 + 1.11    | 6.02 + 1.12    | 5.25 + 1.30    | 5.95 + 0.987   |

Parameters assessed using metabolic cage (n=8 animals). Mean + SD is described.

**Table S6: Metabolic Cage – Light Cycle**

| Metric                     | C57BL/6J(mtC57 BL/6J) | C57BL/6J(mtC57 BL/6J) + oATP8 | C57BL/6J(mt FVB) | C57BL/6J(mtF VB) + oATP8 |
|----------------------------|-----------------------|-------------------------------|------------------|--------------------------|
| Total Distance (cm)        | 258 + 51.1            | 296 + 97.6                    | 225 + 52.9       | 271 + 227                |
| Non-Wheel Activity         | 197 + 45.6            | 238 + 80.2                    | 180 + 42.3       | 212 + 190                |
| Wheel Counts               | 2.49 + 1.98           | 2.13 + 1.72                   | 2.52 + 1.98      | 1.45 + 1.22              |
| Energy Balance             | 4.68 + 1.93           | 6.25 + 1.97                   | 5.52 + 0.941     | 6.17 + 3.85              |
| Energy Expenditure         | 0.347 + 0.0394        | 0.361 + 0.0209                | 0.327 + 0.0448   | 0.363 + 0.0200           |
| Oxygen Consumption         | 70.9 + 8.06           | 73.6 + 4.23                   | 66.7 + 9.14      | 74.4 + 4.26              |
| Carbon Dioxide Production  | 61.3 + 6.90           | 63.8 + 3.94                   | 57.8 + 8.04      | 63.6 + 2.98              |
| Respiratory Exchange Ratio | 0.859 + 0.00945       | 0.862 + 0.0156                | 0.862 + 0.0215   | 0.851 + 0.0158           |
| Hourly Food Intake         | 5.02 + 1.91           | 6.61 + 1.98                   | 5.85 + 0.937     | 6.53 + 3.85              |
| Hourly Water Intake        | 1.96 + 0.599          | 1.84 + 0.657                  | 1.39 + 0.621     | 1.70 + 0.522             |



Parameters assessed using metabolic cage only during the light cycle (n=8 animals). Mean + SD is described.

**Table S7: Metabolic Cage – Dark Cycle**

| Metric                     | C57BL/6J(mtC57 BL/6J) | C57BL/6J(mtC57 BL/6J) + oATP8 | C57BL/6J(mt FVB) | C57BL/6J(mtF VB) + oATP8 |
|----------------------------|-----------------------|-------------------------------|------------------|--------------------------|
| Total Distance (cm)        | 13.0 + 2.77           | 14.2 + 4.43                   | 12.1 + 3.31      | 14.3 + 11.5              |
| Non-Wheel Activity         | 9.87 + 2.38           | 11.4 + 3.68                   | 9.67 + 2.66      | 11.1 + 9.62              |
| Wheel Counts               | 0.622 + 0.393         | 0.554 + 0.547                 | 0.863 + 0.705    | 0.645 + 0.423            |
| Energy Balance             | 0.572 + 0.181         | 0.664 + 0.147                 | 0.678 + 0.185    | 0.518 + 0.311            |
| Energy Expenditure         | 0.0189 + 0.00251      | 0.0190 + 0.00235              | 0.0192 + 0.00423 | 0.0209 + 0.000968        |
| Oxygen Consumption         | 3.79 + 0.501          | 3.82 + 0.473                  | 3.86 + 0.852     | 4.20 + 0.202             |
| Carbon Dioxide Production  | 3.56 + 0.490          | 3.56 + 0.447                  | 3.62 + 0.785     | 3.92 + 0.175             |
| Respiratory Exchange Ratio | 0.932 + 0.0200        | 0.927 + 0.0201                | 0.936 + 0.0181   | 0.928 + 0.0242           |
| Hourly Food Intake         | 0.591 + 0.180         | 0.683 + 0.148                 | 0.697 + 0.188    | 0.539 + 0.311            |
| Hourly Water Intake        | 0.194 + 0.0388        | 0.180 + 0.0361                | 0.184 + 0.0320   | 0.206 + 0.0418           |

Parameters assessed using metabolic cage only during the dark cycle (n=8 animals). Mean + SD is described.

**Table S8: Treadmill Exhaustion Assay:**

| Metric                 | C57BL/6J(mtC57BL/6J) | C57BL/6J(mtC57BL/6J) + oATP8 | C57BL/6J(mtFVB) | C57BL/6J(mtFVB) + oATP8 |
|------------------------|----------------------|------------------------------|-----------------|-------------------------|
| Total Time (seconds/g) | 67.0 + 18.3          | 50.5 + 14.7                  | 69.9 + 8.73     | 58.5 + 11.4             |
| Distance (cm/g)        | 22.6 + 7.73          | 15.5 + 7.12                  | 24.6 + 3.43     | 18.2 + 6.25             |

Parameters assessed using treadmill exhaustion assay. Each of the values are normalized to body weight. C57BL/6J(mtC57BL/6J) (n=7), C57BL/6J(mtC57BL/6J) + oATP8 (n=14), C57BL/6J(mtFVB), (n=8), C57BL/6J(mtFVB) + oATP8 (n=13). Mean + SD is described.

**Table S9: Fertility of Transgenic Animals is not Affected:**

| Parent (Male)                | Parent (Female)              | Average No. Offspring (Total) | SEM  | Average No. Offspring (Male) | SEM  | Average No. Offspring (Female) | SEM  |
|------------------------------|------------------------------|-------------------------------|------|------------------------------|------|--------------------------------|------|
| C57BL/6J(mtC57BL/6J)         | C57BL/6J(mtFVB)              | 6.38                          | 0.47 | 3.44                         | 0.33 | 3.12                           | 0.29 |
| C57BL/6J(mtC57BL/6J) + oATP8 | C57BL/6J(mtC57BL/6J)         | 6.70                          | 0.40 | 2.89                         | 0.33 | 4.00                           | 0.57 |
| C57BL/6J(mtC57BL/6J)         | C57BL/6J(mtC57BL/6J) + oATP8 | 5.40                          | 0.71 | 3.20                         | 0.28 | 3.14                           | 0.37 |
| C57BL/6J(mtC57BL/6J) + oATP8 | C57BL/6J(mtFVB)              | 7.71                          | 0.44 | 3.88                         | 0.37 | 3.50                           | 0.50 |

**Table S10: Genotyping PCR primers**

| Primer Name                             | Sequence                                                                                 | PCR Product Size |
|-----------------------------------------|------------------------------------------------------------------------------------------|------------------|
| CAG - Forward<br>PolyA - Reverse        | 5'GCCTCTGCTAACCATGTTTCATGCCTTCTTC3'<br>5'ATGTGGTATGGCTGATTATGATCAGTTATCTAG<br>3'         | 714 bp           |
| 425N - Forward<br>CAG - Reverse         | 5'GGTGATAGGTGGCAAGTGGTATTCCGTAAG3'<br>5'CATATATGGGCTATGAACTAATGACCCCGT3'                 | 447 bp           |
| ROSA26 -<br>Forward*<br>CAG - Reverse   | ASC Proprietary Sequence (AST-2006-MT150-a)<br>5'CATATATGGGCTATGAACTAATGACCCCGT3'        | 635 bp           |
| PolyA - Forward<br>ROSA26 -<br>Reverse* | 5'CTAGATAACTGATCATAATCAGCCATACCACAT<br>3'<br>ASC Proprietary Sequence (AST-2006-MT150-d) | 687 bp           |

\* Proprietary primers acquired from ASC.

**Table S11: Quantitative RT-PCR primers**

| Primer Name                              | Sequence                                                 |
|------------------------------------------|----------------------------------------------------------|
| COX3-Forward<br>COX3-Reverse             | 5'ACACATGATCTAGGAGGCTGC3'<br>5'AAGCTTGGAGGATGGTGAAGT3'   |
| COX10-Forward<br>COX10-Reverse           | 5'GAAGAAAGGCTTTGGCCGTG3'<br>5'GGCCGCAACAAGTCCTAGAT3'     |
| Endo-ATP8-Forward*<br>Endo-ATP8-Reverse* | 5'TGCCACAACCTAGATACATCAACA3'<br>5'AGGTGCCAGTGGGAATGTTT3' |
| Exo-ATP8-Forward*<br>Exo-ATP8-Reverse*   | 5'GCTGGACACCTCTACATGGTT3'<br>5'TCACCTTCATTGTGGTCAGGG3'   |
| ATP6-Forward<br>ATP6-Reverse             | 5'GCAGTCCGGCTTACAGCTAA3'<br>5'GGTAGCTGTTGGTGGGCTAA3'     |

\*Endo-ATP8= mitochondrially encoded ATP8; Exo-ATP8= exogenous allotopic ATP8

**Table S12: Mass Spectrometry of all samples using direct-DIA quantification.****Table S13: Mass Spectrometry Protein Quantification data**

**Table S14: Mass Spectrometry Peptide Quantification data****Table S15: Statistical analysis**

| Figures/Tables                                                                                                                                                | Tests                                                                                                                                               |
|---------------------------------------------------------------------------------------------------------------------------------------------------------------|-----------------------------------------------------------------------------------------------------------------------------------------------------|
| Fig 3A: ATP8 expression in different tissues, C57BL/6J (mt C57BL/6J) and C57BL/6J (mt C57BL/6J) + oATP8                                                       | Values are expressed as means $\pm$ standard error of the mean                                                                                      |
| Fig 3B: oATP8 expression in different tissues, C57BL/6J (mt FVB) and C57BL/6J(mt FVB)+ oATP8                                                                  | Values are expressed as means $\pm$ standard error of the mean                                                                                      |
| Fig 4A: ATP8 expression in mitochondrial fractions                                                                                                            | Values are expressed as means $\pm$ standard error of the mean                                                                                      |
| Fig 5A: Quantitative RT-PCR detection of mRNA levels for transgenic oATP8 normalized to Actin                                                                 | Error bars show SEM. Two-way ANOVA was performed                                                                                                    |
| Fig 5B: Quantitative RT-PCR detection of mRNA levels for transgenic oATP8 normalized to Cox10                                                                 | Error bars show SEM. Two-way ANOVA was performed                                                                                                    |
| Fig 5C: Quantitative RT-PCR detection of mRNA levels for endogenous oATP8 normalized to Cox3                                                                  | Error bars show SEM. Two-way ANOVA was performed                                                                                                    |
| Fig 6B oATP8 and endogenous ATP8 expression in mouse liver tissue from 6-, 12-, 30-, and 50-week-old transgenic C57BL/6J(mtC57BL/6J) and C57BL/6J(mtFVB) mice | Error bars show SEM. Two-way ANOVA with Šídák's multiple comparisons. $P > 0.05$ : NS (not significant); $P = 0.0018$ : **; $P \leq 0.0001$ : ****. |
| Fig 6C Apparent oATP8/ATP8 ratio in mouse liver tissue from 6-, 12-, 30-, and 50-week-old transgenic C57BL/6J(mtC57BL/6J) and C57BL/6J(mtFVB) mice            | Error bars show SEM. Two-way ANOVA with Šídák's multiple comparisons. $P > 0.05$ : NS (not significant); $P = 0.0205$ : *; $P = 0.00015$ : **.      |
| Fig 6E: oATP8 and endogenous ATP8 expression in mouse liver mitochondria from transgenic C57BL/6J(mtC57BL/6J) and C57BL/6J(mtFVB) mice                        | Error bars show SEM. Two-way ANOVA with Šídák's multiple comparisons. $P > 0.05$ : NS (not significant); $P = 0.0114$ : *.                          |
| Fig 6F: Apparent oATP8/ATP8 ratio in mouse liver mitochondria from transgenic C57BL/6J(mtC57BL/6J) and C57BL/6J(mtFVB) mice                                   | Error bars show SEM. Unpaired t test with Welch's correction. $P > 0.05$ : NS (not significant).                                                    |

|                                                                                                                                      |                                                                                            |
|--------------------------------------------------------------------------------------------------------------------------------------|--------------------------------------------------------------------------------------------|
| Fig 7B Quantitative assessment of ATP hydrolysis activity from liver mitochondria from 12-week-old male mice                         | Vmax and Km values were calculated with 95% CI                                             |
| Fig 7C Oligomycin sensitivity                                                                                                        | IC50 values were calculated with 95% CI                                                    |
| Fig 7D: ATP synthesis and maximal respiratory capacity were monitored in isolated mitochondria from 9 - 12-week-old male mice        | Error bars show SEM. Two -way ANOVA was performed                                          |
| Fig 7E: ATP synthesis and maximal respiratory capacity were monitored in skeletal muscle mitochondria from 9 - 12-week-old male mice | Error bars show SEM. Two -way ANOVA was performed                                          |
| Figure S3 Quantitative RT-PCR detection of mRNA levels for endogenous ATP6 from brain from 50-week old mice                          | Error bars show SEM. Two-way ANOVA was performed; P = 0.0165.                              |
| Table S1 ATP Hydrolysis Activity                                                                                                     | Vmax and Km values were calculated with 95% CI                                             |
| Table S2 Oligomycin sensitivity                                                                                                      | IC50 values were calculated with 95% CI                                                    |
| Table S3 Open Field Test                                                                                                             | Values are expressed as means $\pm$ SD                                                     |
| Table S4 Elevated Plus Maze Test                                                                                                     | Values are expressed as means $\pm$ SD                                                     |
| Table S5 Metabolic Cage – Full Day Cycle                                                                                             | Values are expressed as means $\pm$ SD                                                     |
| Table S6 Metabolic Cage – Light Cycle                                                                                                | Values are expressed as means $\pm$ SD                                                     |
| Table S7 Metabolic Cage – Dark Cycle                                                                                                 | Values are expressed as means $\pm$ SD                                                     |
| Table S8 Treadmill Exhaustion Assay                                                                                                  | Values are expressed as means $\pm$ SD                                                     |
| Table S9 Fertility of Transgenic Animals is not Affected                                                                             | Values are expressed as means $\pm$ SD                                                     |
| Table S12 Mass Spectrometry of all samples using direct-DIA quantification                                                           | a paired t-test, and p-values were corrected for multiple testing, using the Storey method |
| Table S13 Mass Spectrometry Protein Quantification data                                                                              | a paired t-test, and p-values were corrected for multiple testing, using the Storey method |
| Table S14 Mass Spectrometry Peptide Quantification data                                                                              | a paired t-test, and p-values were corrected for multiple testing, using the Storey method |
